# Supplementary material
Source: publisher figshare collection journal article supplement (https://tandf.figshare.com/articles/dataset/_/24114462)
Supplement: Supplementary file 1 [file 1]

**Appendix1*. Prototype day in IPE unit, including responsibilities of students and tutors***

| **Prototype day in IPE unit** | | **IPE Students** | **Nursing tutor**  **(registered or obstetric nurses)** | **Midwifery tutor** |
| --- | --- | --- | --- | --- |
| 07:30-07:45 | morning report | - Brief information about all patients on the ward, including patients in IPE unit - Overview of tutors and other HCPs on the ward | | |
| 07:45-10:45 | on Monday: intro + discussion of learning objectives with IPE coordinator  Patient care | - Chart reading IPE patients - Patient care - Check ups - Chart writing - Discussing care policy plans among each other | - Chart reading IPE patients - Provide students with a tour around the ward on Mondays - Guide students in patient care | - Chart reading all patients on the ward - Care for other patients on the ward - Guide students in case of emergency |
| 10:45-11:45 | Patient care meeting | Tutors guide students in clinical reasoning, helping them to present patient in a clear manner and to come to optimal care policy plans | | |
| 11:45-12:30 | Lunch | - Students have lunch together as a team - Tutors have lunch with students or colleagues on the ward | | |
| 12:30-15:00 | Patient care, discharge consultations, finalizing chart writing | - Patient care - Discharge consultations - Finalizing chart writing | - Guide students in patient care - Check and approve patient files | - Care for other patients on the ward - Guide students in discharge consultations |
| 15:00-15:15 | afternoon report | Nurses guide students in handoff of patient to nurses of evening shift | | Check and approve medical files |
| 15:15-16:00 | Education guided by midwife, physician, lactation specialist | Education guided by physician, lactation specialist or midwifery tutor, based on questions or problems that came up during patient care meeting | | |
